# Supplementary material for: One-step hydrothermal coating approach to photocatalytically active oxide composites
Source: Royal Society of Chemistry journal article supplement (doi:10.1039/b926790e), 2010-01-01
Supplement: b926790e.pdf [file b926790e.pdf]

## Supporting Information

# One-Step Hydrothermal Coating Approach to Photocatalytically Active Oxide Composites

Ying Zhou, Frank Krumeich, Andre Heel, and Greta R. Patzke\*

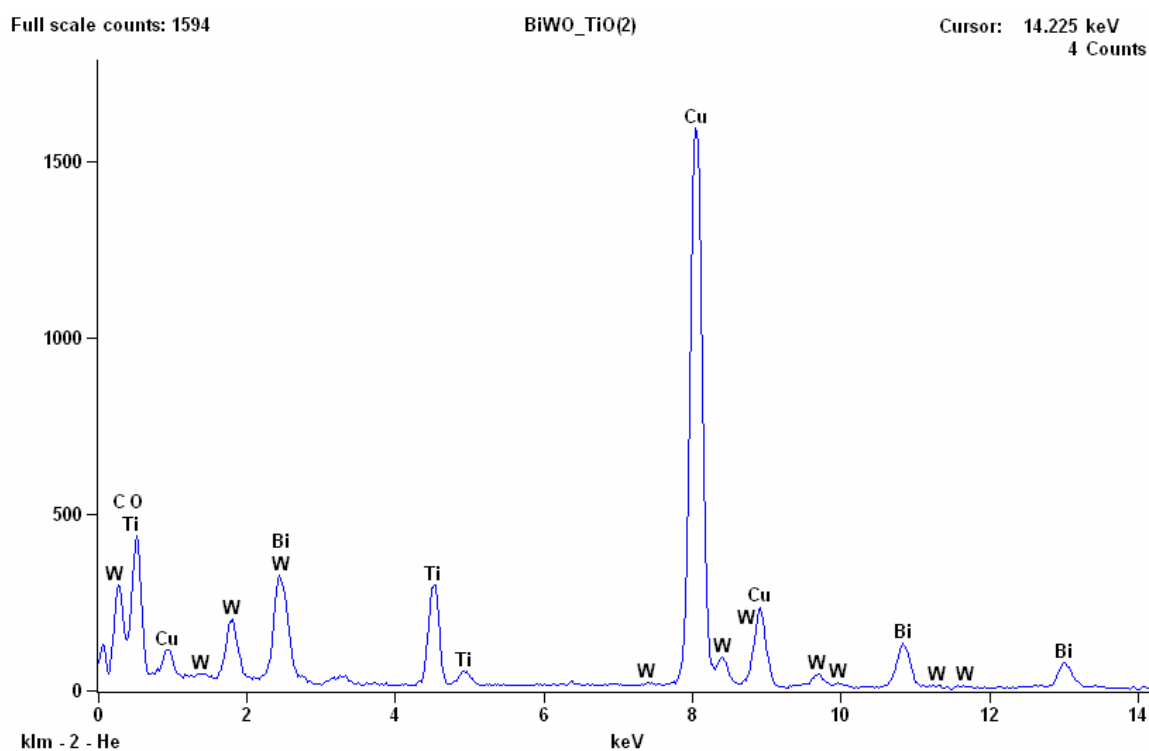

**Figure S1.** EDXS analysis of hierarchical  $\text{Bi}_2\text{WO}_6/\text{TiO}_2$  composites (the Cu peak arises from the supporting Cu grid and the C peak arises from the C foil and contaminations).
